# Supplementary material
Source: MDPI journal article supplement (https://www.mdpi.com/2076-3417/9/20/4243)
Supplement: s1 [file s1]

# Supplementary Material: Mass Transfer of Microscale Light-Emitting Diodes to Unusual Substrates by Spontaneously Formed Vertical Tethers During Chemical Lift-Off

Ja-Yeon Kim <sup>1</sup>, Yoo-Hyun Cho <sup>1,2</sup>, Hyun-Sun Park <sup>1,2</sup>, Jae-Hyun Ryou <sup>3</sup> and Min-Ki Kwon <sup>2,\*</sup>

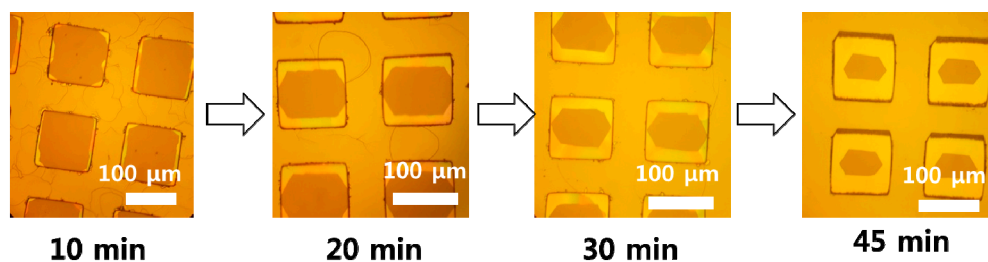

**Figure S1.** Spontaneous formation of vertical tethers.

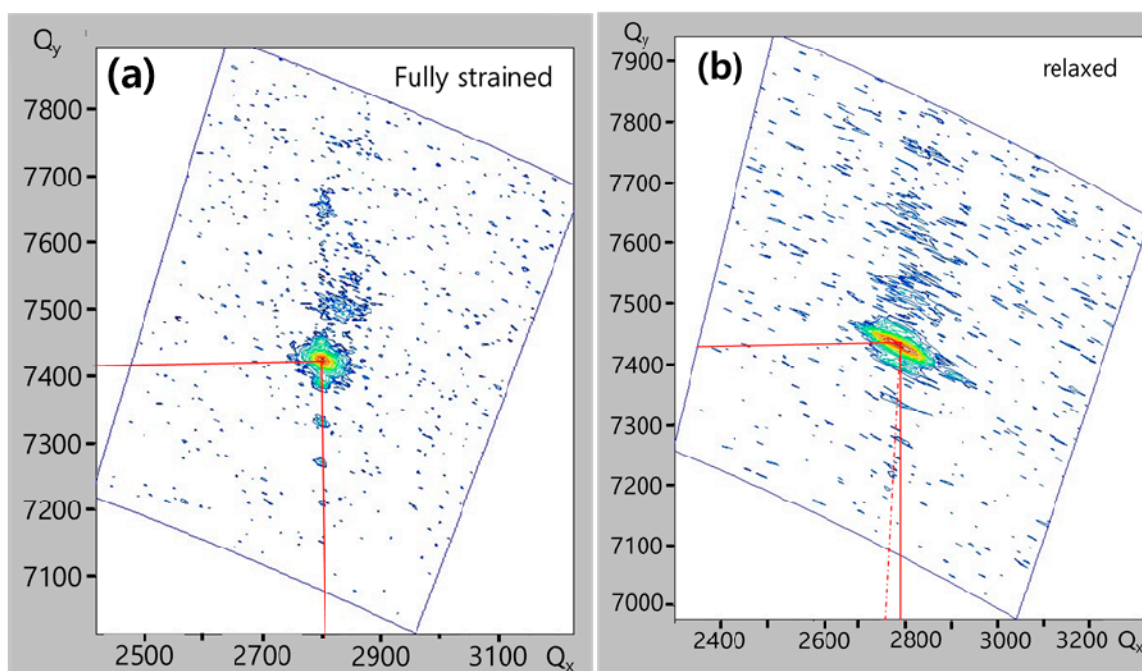

**Figure S2.** X-ray reciprocal space mapping (RSM) of X-ray diffraction intensity around the (105) reflector for micro LED (a) before and (b) after transfer to Si substrate.
